# Supplementary material for: Solvent-free oxidation of cyclohexane by oxygen over Al–Cu–Co alloys: influence of the phase structure and electrical conductivity on catalytic activity
Source: Royal Society of Chemistry journal article supplement (doi:10.1039/c7nj00238f), 2017-01-01
Supplement: c7nj00238f1.pdf [file c7nj00238f1.pdf]

Solvent-free oxidation of cyclohexane by oxygen over Al-Cu-Co  
alloys: Influence of phase structure and electrical conductivity on  
catalytic activity

Xiaofei Song, Jianmin Hao\*, Yijia Bai, Limin Han, Guangfei Yan, Xu Lian, Jiansheng Liu

*College of Chemical Engineering, Inner Mongolia University of Technology, Hohhot 010051,  
P. R. China.*

Corresponding author: Dr. Jianmin Hao

Tel. & Fax: +86-471-6575675

Email: haojmin@foxmail.com

**To be published in “New Journal of Chemistry”**

Table S1 Chemical composition of Al-Cu-Co alloys

Table S2 EDX analysis in the selected points of Al<sub>60</sub>Cu<sub>5</sub>Co<sub>35</sub> alloy ingot profile

Figure S1 GC-MS spectra for liquid products of cyclohexane oxidation

Figure S2 Possible reaction mechanism of cyclohexane oxidation over Al-Cu-Co alloy

Table S1 Chemical composition of Al-Cu-Co alloys

| Entry | Theoretical atomic ratio                           | Wt% (Actual) |      |      | Actual atomic ratio                                      |
|-------|----------------------------------------------------|--------------|------|------|----------------------------------------------------------|
|       |                                                    | Al           | Cu   | Co   |                                                          |
| 1     | Al <sub>70</sub> Cu <sub>30</sub>                  | 46.6         | 48.3 | -    | Al <sub>69.5</sub> Cu <sub>30.5</sub>                    |
| 2     | Al <sub>60</sub> Cu <sub>40</sub>                  | 36.0         | 56.3 | -    | Al <sub>60.1</sub> Cu <sub>39.9</sub>                    |
| 3     | Al <sub>50</sub> Cu <sub>50</sub>                  | 28.2         | 66.3 | -    | Al <sub>50.1</sub> Cu <sub>49.9</sub>                    |
| 4     | Al <sub>40</sub> Cu <sub>60</sub>                  | 22.1         | 72.9 | -    | Al <sub>41.6</sub> Cu <sub>58.4</sub>                    |
| 5     | Al <sub>70</sub> Co <sub>30</sub>                  | 51.7         | -    | 45.7 | Al <sub>71.2</sub> Co <sub>28.8</sub>                    |
| 6     | Al <sub>60</sub> Co <sub>40</sub>                  | 39.2         | -    | 59.3 | Al <sub>59.1</sub> Co <sub>40.9</sub>                    |
| 7     | Al <sub>50</sub> Co <sub>50</sub>                  | 30.9         | -    | 69.1 | Al <sub>49.4</sub> Co <sub>50.6</sub>                    |
| 8     | Al <sub>40</sub> Co <sub>60</sub>                  | 23.3         | -    | 76.0 | Al <sub>40.1</sub> Co <sub>59.9</sub>                    |
| 9     | Al <sub>65</sub> Cu <sub>30</sub> Co <sub>5</sub>  | 43.2         | 47.1 | 8.7  | Al <sub>64.3</sub> Cu <sub>29.8</sub> Co <sub>5.9</sub>  |
| 10    | Al <sub>65</sub> Cu <sub>25</sub> Co <sub>10</sub> | 43.5         | 41.2 | 14.4 | Al <sub>64.4</sub> Cu <sub>25.9</sub> Co <sub>9.7</sub>  |
| 11    | Al <sub>65</sub> Cu <sub>20</sub> Co <sub>15</sub> | 44.0         | 31.8 | 23.0 | Al <sub>64.7</sub> Cu <sub>19.9</sub> Co <sub>15.4</sub> |
| 12    | Al <sub>65</sub> Cu <sub>15</sub> Co <sub>20</sub> | 43.7         | 24.4 | 29.2 | Al <sub>64.8</sub> Cu <sub>15.3</sub> Co <sub>19.9</sub> |
| 13    | Al <sub>65</sub> Cu <sub>10</sub> Co <sub>25</sub> | 45.3         | 15.3 | 37.5 | Al <sub>65.7</sub> Cu <sub>9.4</sub> Co <sub>24.9</sub>  |
| 14    | Al <sub>75</sub> Cu <sub>10</sub> Co <sub>15</sub> | 51.6         | 16.8 | 25.5 | Al <sub>73.3</sub> Cu <sub>10.1</sub> Co <sub>16.6</sub> |
| 15    | Al <sub>70</sub> Cu <sub>15</sub> Co <sub>15</sub> | 48.9         | 24.6 | 23.6 | Al <sub>69.7</sub> Cu <sub>14.9</sub> Co <sub>15.4</sub> |
| 16    | Al <sub>60</sub> Cu <sub>25</sub> Co <sub>15</sub> | 38.2         | 37.7 | 21.0 | Al <sub>59.8</sub> Cu <sub>25.1</sub> Co <sub>15.1</sub> |
| 17    | Al <sub>55</sub> Cu <sub>30</sub> Co <sub>15</sub> | 33.2         | 42.0 | 19.9 | Al <sub>55.2</sub> Cu <sub>29.6</sub> Co <sub>15.2</sub> |
| 18    | Al <sub>50</sub> Cu <sub>35</sub> Co <sub>15</sub> | 29.5         | 49.3 | 18.1 | Al <sub>50.2</sub> Cu <sub>35.6</sub> Co <sub>14.2</sub> |
| 19    | Al <sub>65</sub> Cu <sub>5</sub> Co <sub>30</sub>  | 43.3         | 7.6  | 43.8 | Al <sub>65.0</sub> Cu <sub>4.9</sub> Co <sub>30.1</sub>  |
| 20    | Al <sub>60</sub> Cu <sub>5</sub> Co <sub>35</sub>  | 38.8         | 7.6  | 50.7 | Al <sub>59.5</sub> Cu <sub>5.0</sub> Co <sub>35.5</sub>  |
| 21    | Al <sub>55</sub> Cu <sub>5</sub> Co <sub>40</sub>  | 35.2         | 7.4  | 57.3 | Al <sub>54.5</sub> Cu <sub>4.9</sub> Co <sub>40.6</sub>  |
| 22    | Al <sub>50</sub> Cu <sub>5</sub> Co <sub>45</sub>  | 30.9         | 7.1  | 61.1 | Al <sub>49.9</sub> Cu <sub>4.9</sub> Co <sub>45.2</sub>  |
| 23    | Al <sub>45</sub> Cu <sub>5</sub> Co <sub>50</sub>  | 26.1         | 8.1  | 65.3 | Al <sub>44.0</sub> Cu <sub>5.7</sub> Co <sub>50.3</sub>  |

Table S2 EDX analysis in the selected points of Al<sub>60</sub>Cu<sub>5</sub>Co<sub>35</sub> alloy ingot profile

|                     | Al (mol%) | Cu (mol%) | Co (mol%) | Total (mol%) |
|---------------------|-----------|-----------|-----------|--------------|
| Red point 1         | 53.72     | 2.25      | 44.03     | 100          |
| Red point 2         | 54.20     | 2.15      | 43.65     | 100          |
| Red point 3         | 54.39     | 2.36      | 43.25     | 100          |
| Average value       | 54.11     | 2.25      | 43.64     | 100          |
| Red point 4         | 69.64     | 4.44      | 25.92     | 100          |
| Red point 5         | 68.78     | 4.78      | 26.44     | 100          |
| Red point 6         | 70.11     | 4.89      | 25.00     | 100          |
| Average value       | 69.51     | 4.70      | 25.79     | 100          |
| Total average value | 61.81     | 3.48      | 34.71     | 100          |

RT: 2.98 - 28.04

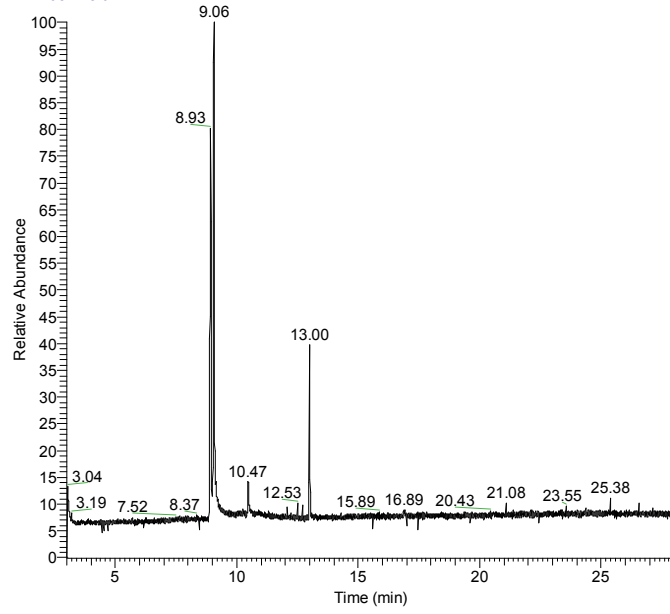

NL: 2.18E8  
TIC MS  
haojianmin\_170401180  
129

haojianmin\_170401180129 #2699-2706 RT: 8.90-8.93 AV: 8 NL: 2.71E7  
T: + c Full ms [1.00-650.00]

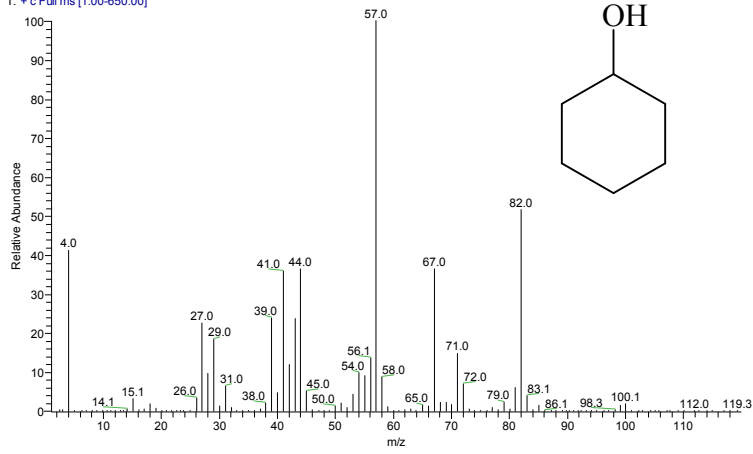

haojianmin\_170401180129 #2744-2751 RT: 9.05-9.07 AV: 8 NL: 3.63E7  
T: + c Full ms [1.00-650.00]

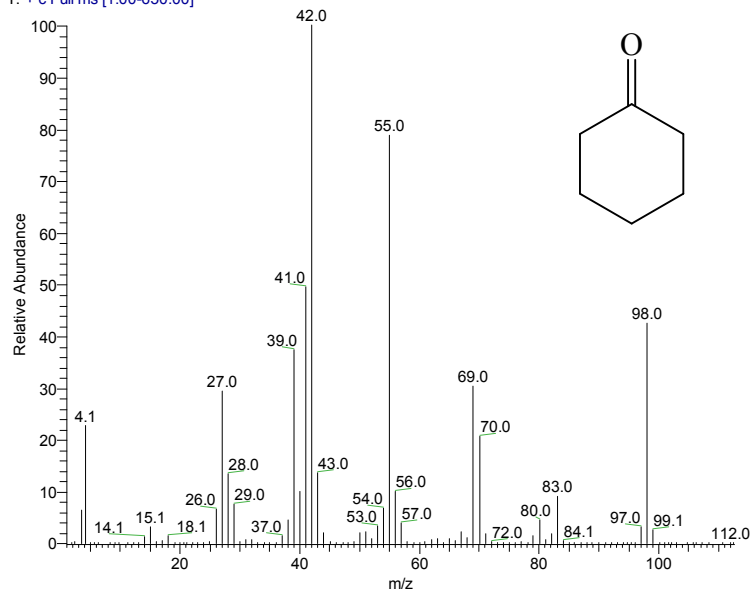

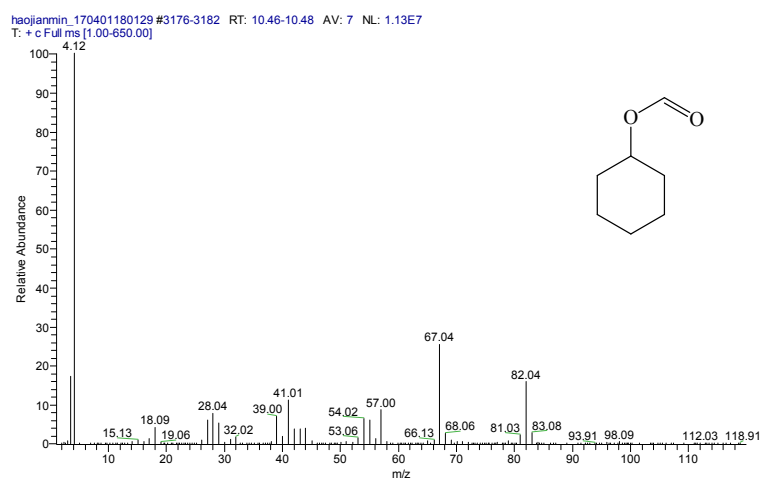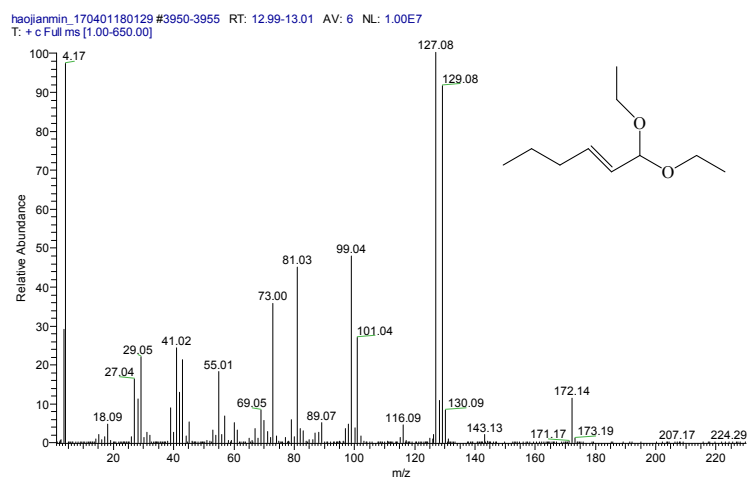

Figure S1 GC-MS spectra for liquid products of cyclohexane oxidation

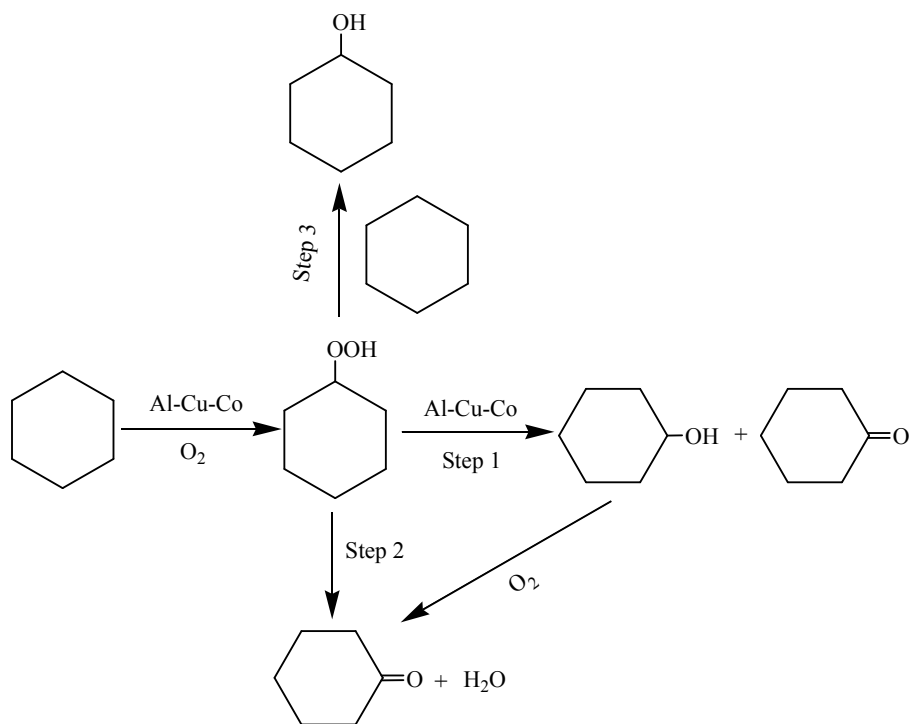

Figure S2 Possible reaction mechanism of cyclohexane oxidation over Al-Cu-Co alloy.
